# Supplementary material for: Anthropogenic fine particulate matter pollution will be exacerbated in eastern China due to 21st century GHG warming
Source: Copernicus journal article supplement (doi:10.5194/acp-19-233-2019), 2019-01-08
Supplement: Supplementary file 1 [file acp-19-233-2019-supplement.pdf]

Supplement of Atmos. Chem. Phys., 19, 233–243, 2019  
<https://doi.org/10.5194/acp-19-233-2019-supplement>  
© Author(s) 2019. This work is distributed under  
the Creative Commons Attribution 4.0 License.

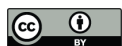

*Supplement of*

## **Anthropogenic fine particulate matter pollution will be exacerbated in eastern China due to 21st century GHG warming**

**Huopo Chen et al.**

*Correspondence to:* Huopo Chen ([chenhuopo@mail.iap.ac.cn](mailto:chenhuopo@mail.iap.ac.cn))

The copyright of individual parts of the supplement might differ from the CC BY 4.0 License.

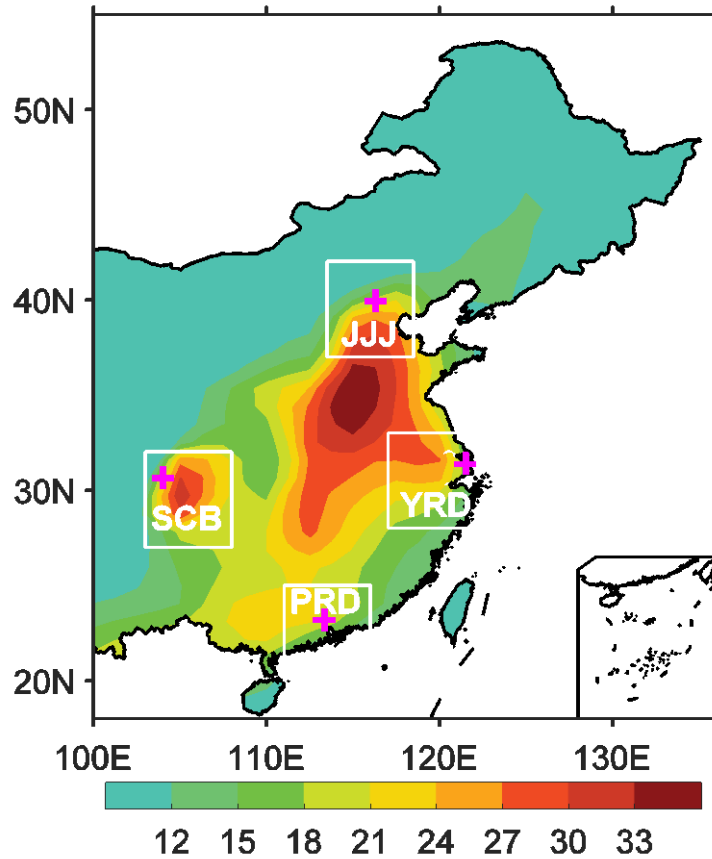

**Figure S1.** The simulated total PM<sub>2.5</sub> surface concentration (including sulfate, black carbon, primary organic matter, and secondary organic aerosols) during the years of 2006-2015 from RCP8.5\_FixAerosol2005 experiment by CESM1. The boxes with 5° longitude by 5° latitude represent the four economic zones in China (JJJ: Beijing-Tianjin-Hebei; YRD: lower reach of Yangtze River valley; PRD: Pearl River Valley; SCB: Sichuan basin), in which the changes of air pollutions will be deeply discussed in the text. Units: µg/m<sup>3</sup>.

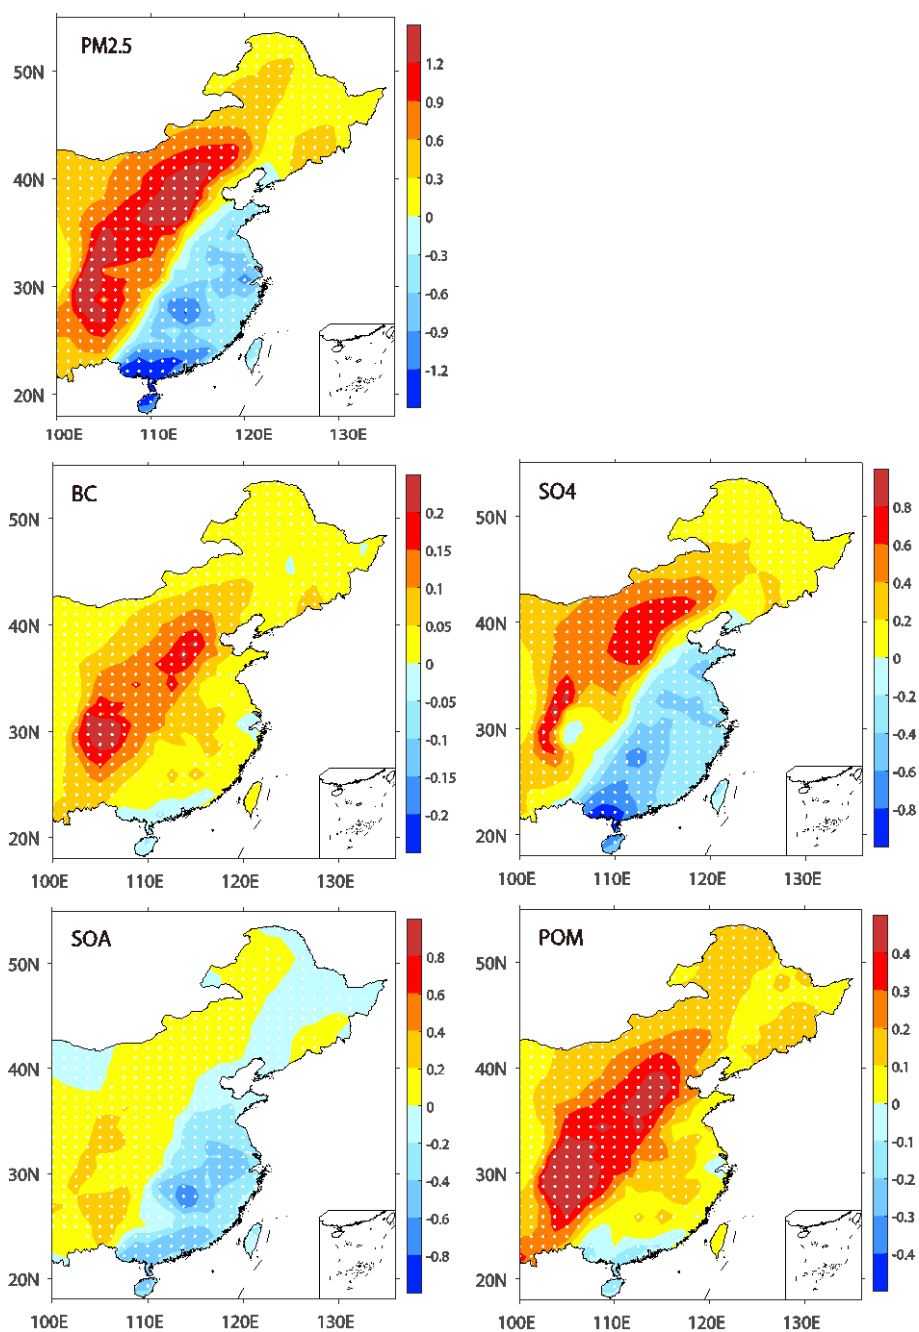

**Figure S2.** Simulated linear trends of the total PM<sub>2.5</sub> surface concentration as well as its associated species (BC, SO<sub>4</sub>, SOA, and POM) across eastern China for the years of 2006-2009. The linear trends are calculated by the nonparametric Mann-Kendall and Sen's methods, and the significant trends with 0.01 significant level are illustrated by dots. Units:  $\mu\text{g}/\text{m}^3/100\text{a}$ .

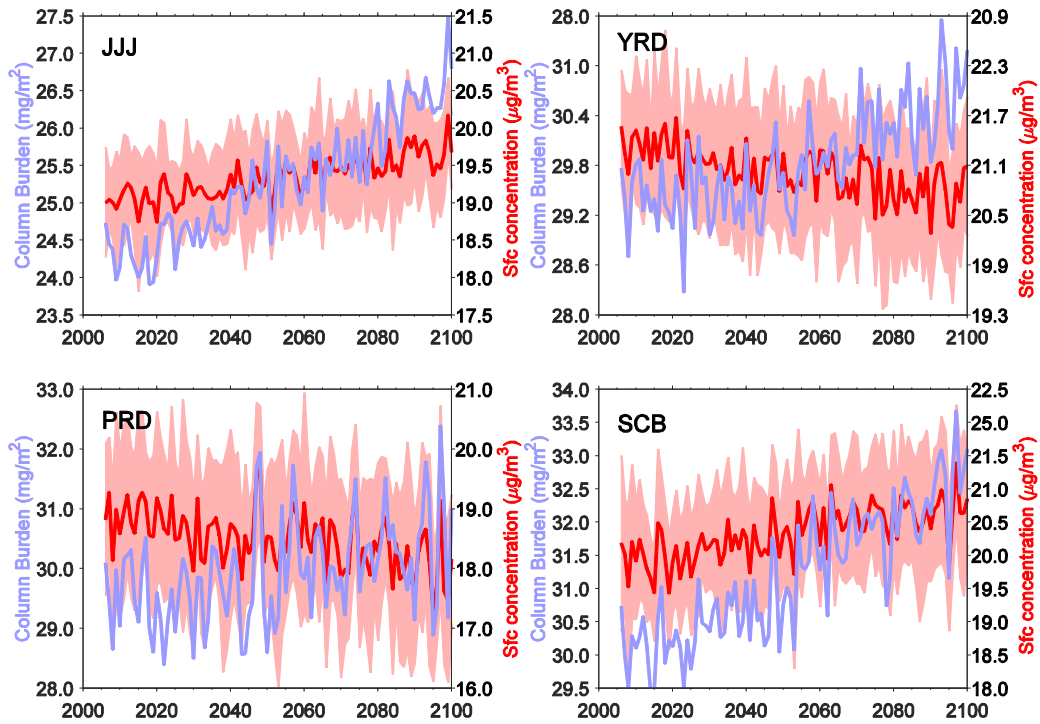

**Figure S3.** Plots of future changes of total  $\text{PM}_{2.5}$  loadings averaged over four economic zones in China, including JJJ, YRD, PRD, and SCB, in term of the surface concentration ( $\mu\text{g}/\text{m}^3$ , right axis in red) and column burden ( $\text{mg}/\text{m}^2$ , left axis in blue) from the simulations of RCP8.5\_FixAerosol2005 experiment. Ensemble variance (1 sigma) for surface concentration is shown in red shadings.

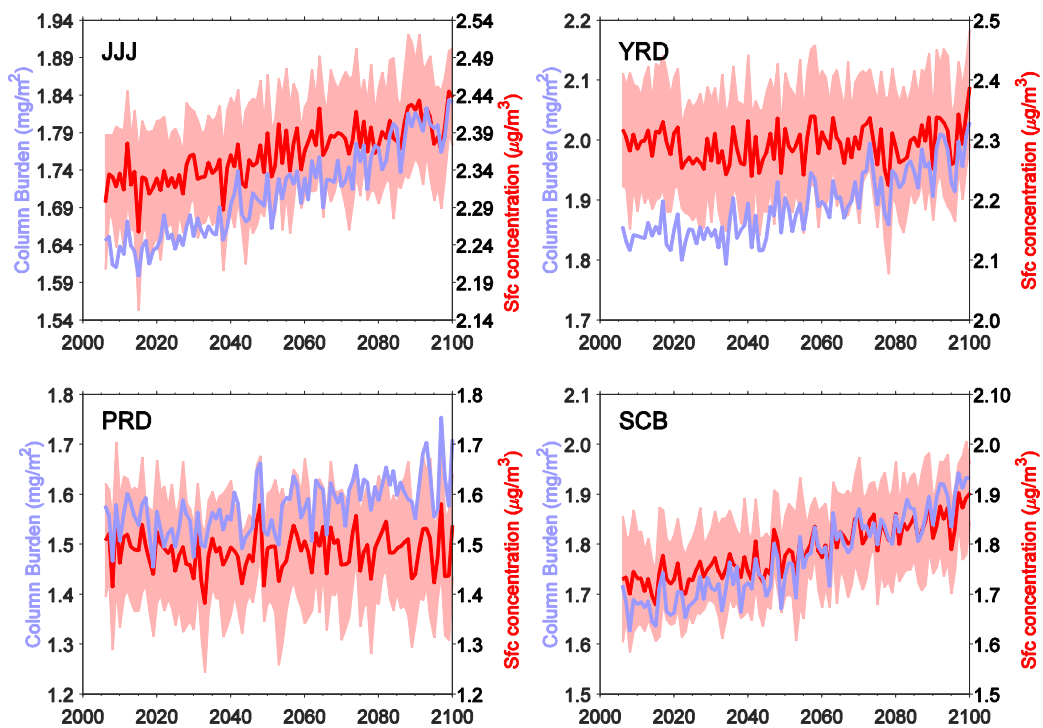

**Figure S4.** Similar to Figure S3 but for the BC.

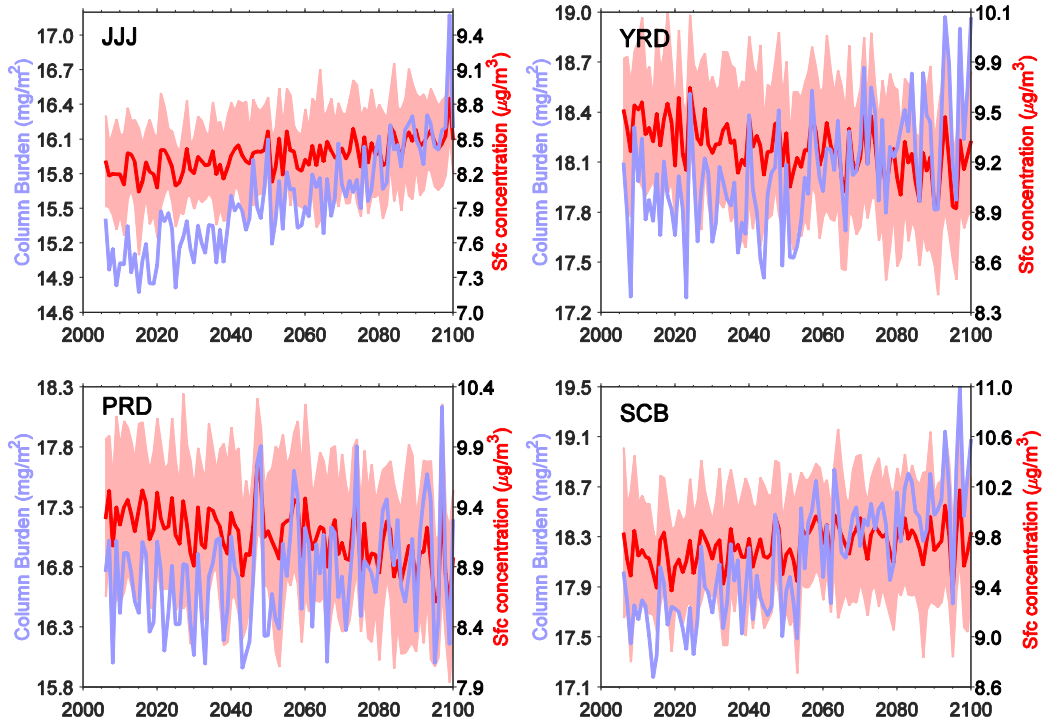

**Figure S5.** Similar to Figure S3 but for the SO<sub>4</sub>.

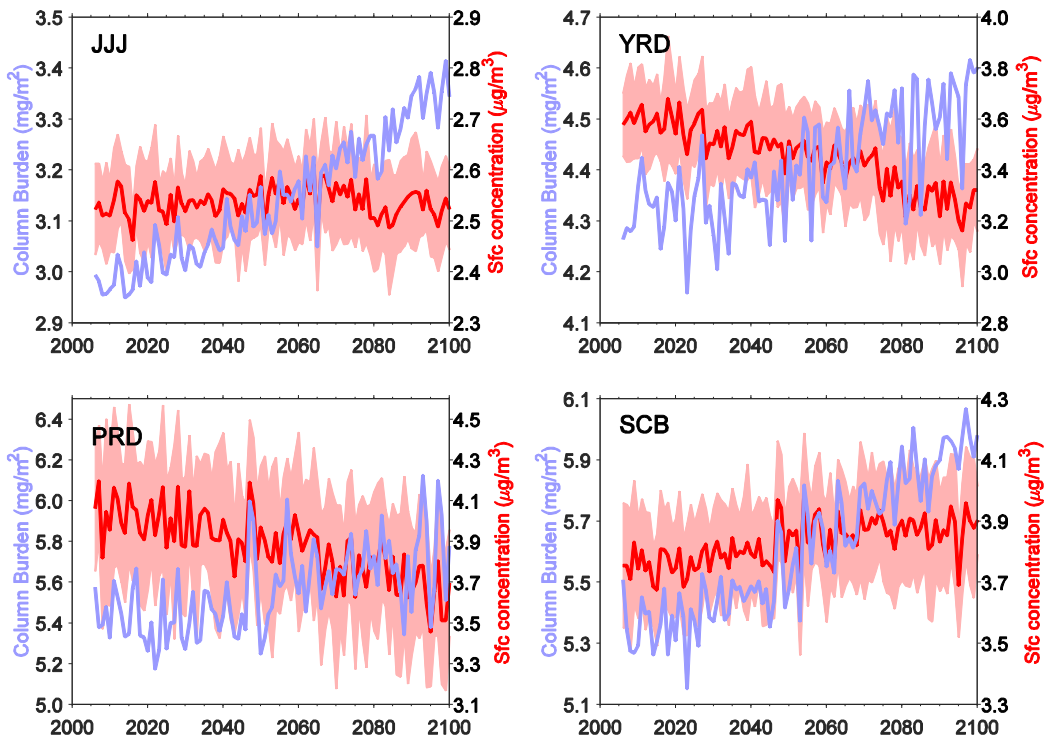

**Figure S6.** Similar to Figure S3 but for the SOA.

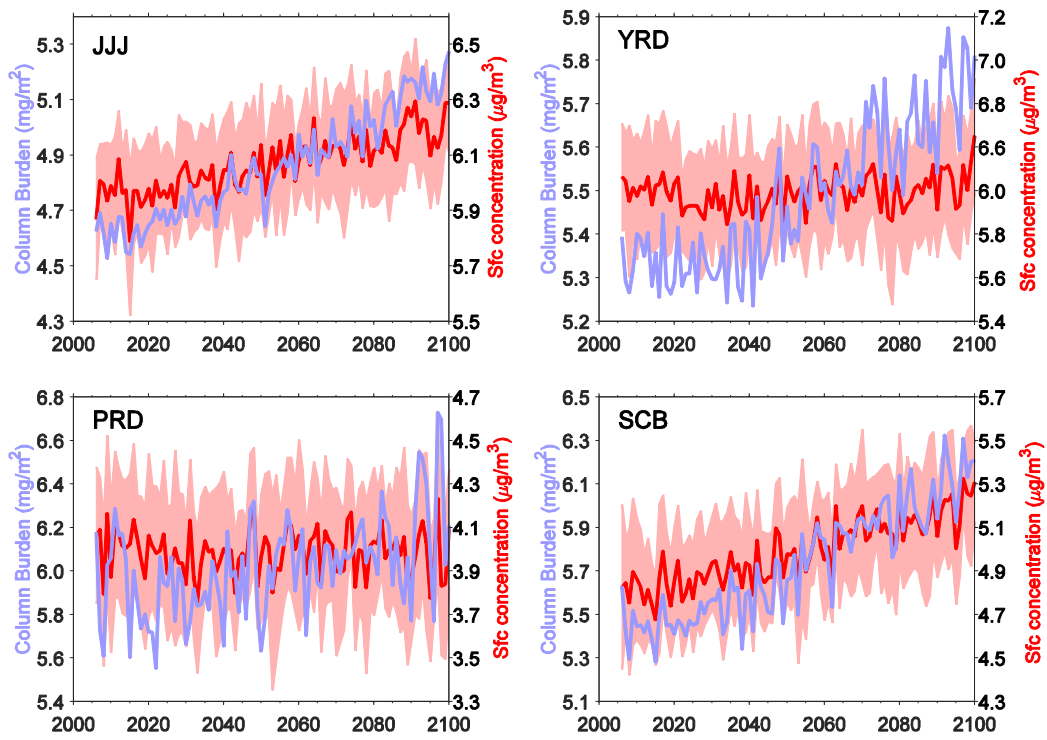

**Figure S7.** Similar to Figure S3 but for the POM.



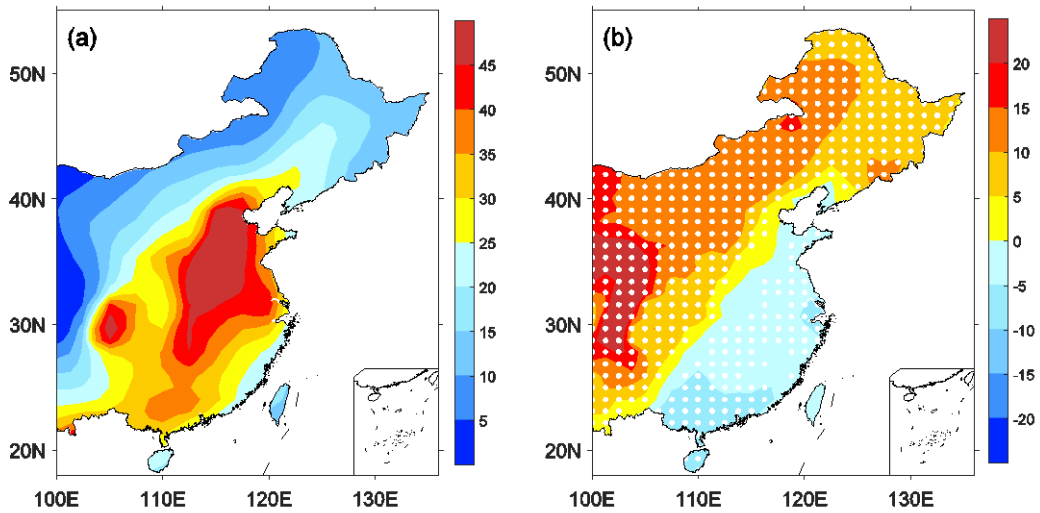

**Figure S8.** Changes of the anthropogenic PM<sub>2.5</sub> pollution days across eastern China from the RCP8.5\_FixAerosol2005 experiment. The pollution days is defined as the daily PM<sub>2.5</sub> surface concentration exceeding the 90<sup>th</sup> percentile threshold that estimated from the period of 2006-2015. Left panel illustrates the annual averaged air pollution days in 2006-2015 and right panel shows changes of the pollution days at the end of 21<sup>st</sup> century with respect to 2006-2015. Dots mean the changes are significant at the 95% confidence level using Student T-test for all years and ensembles. Units: days.
